# Supplementary material
Source: Springer Nature journal article supplement (https://www.springermedizin.de/resource/supplementary/12889_2013_6020_MOESM3_ESM.pdf/9494160)
Supplement: MOESM3 [file 9494160]

**3716 participants invited**  
|  
**1448 participants included**  
Participants who received an invitation letter in the past (N=272), or reported they have tested in the past 6 months (N=165) were excluded.

**49.2% No letter**  
N=713

**23.9% read PHS letter**  
N=346

**26.9% read new letter**  
N=389

**3 sciATs**  
1) Annoyance 2) Threat, 3) Reassurance  
Order of sciATs is counterbalanced

**Questionnaire**  
Measuring reasoned reactions, past behaviors, and intentions.

**No questionnaire**

Questionnaire to evaluate the PHS letter

Questionnaire to evaluate the new letter
